# Supplementary material for: MS4A4A modifies the risk of Alzheimer disease by regulating lipid metabolism and immune response in a unique microglia state
Source: medRxiv preprint, doi:10.1101/2023.02.06.23285545, version 1 (2023-02-08)
Supplement: Supplemental Figures [file 285545_file03.pdf]

# Supplemental Figure 1

## A *MS4A4A* / rs1582763

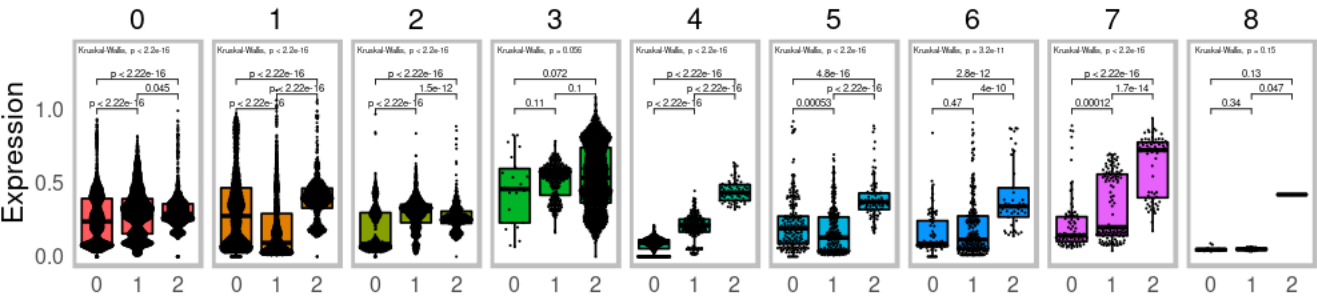

## B *MS4A4A* / rs6591561

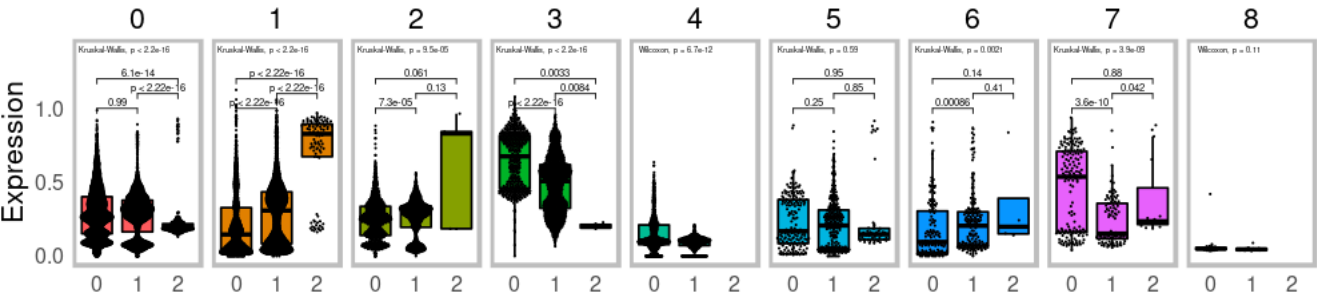

Supplemental Figure 1. *MS4A4A* expression split by (A) rs1582763 and (B) rs6591561 genotypes across microglia clusters Mic.0, Mic.1, Mic.2.

# Supplemental Figure 2

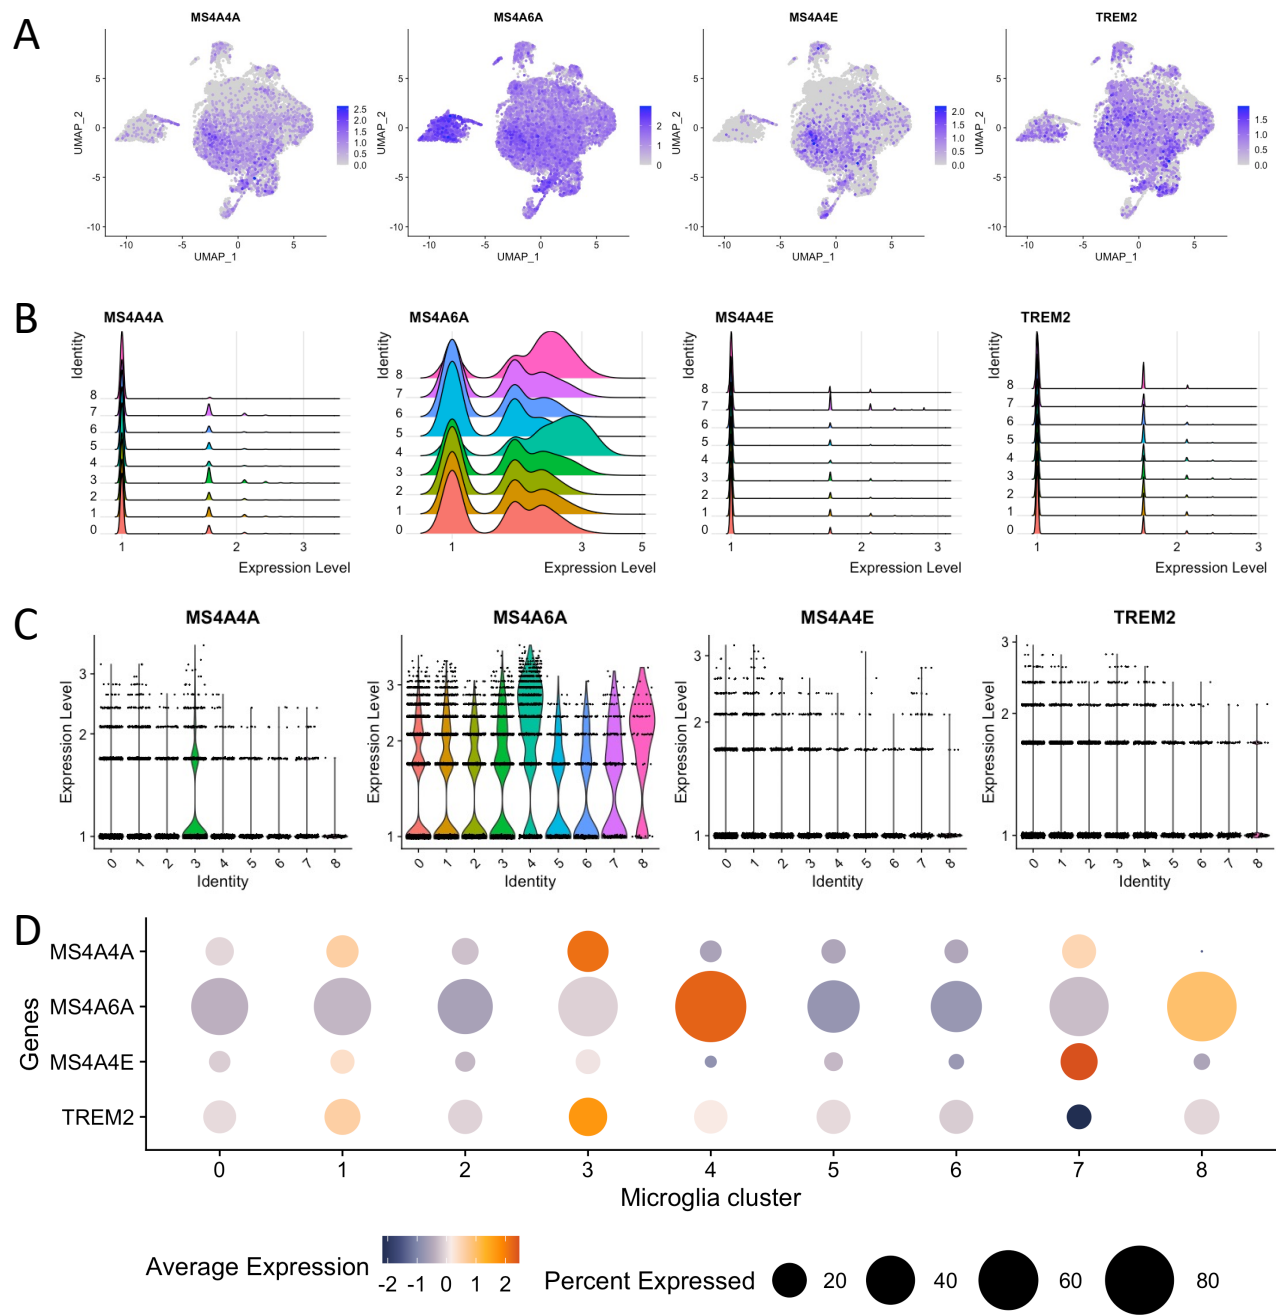

**Supplemental Figure 2. *MS4A4A*, *MS4A6A*, *MS4A4E* and *TREM2* expression across the microglia clusters in human brain snRNA-seq. (A) Feature plot (B) Ridge plot (C) Violin plot (D) Dot plot of *MS4A4A*, *MS4A6A*, *MS4A4E* and *TREM2* across different microglia clusters.**

# Supplemental Figure 3

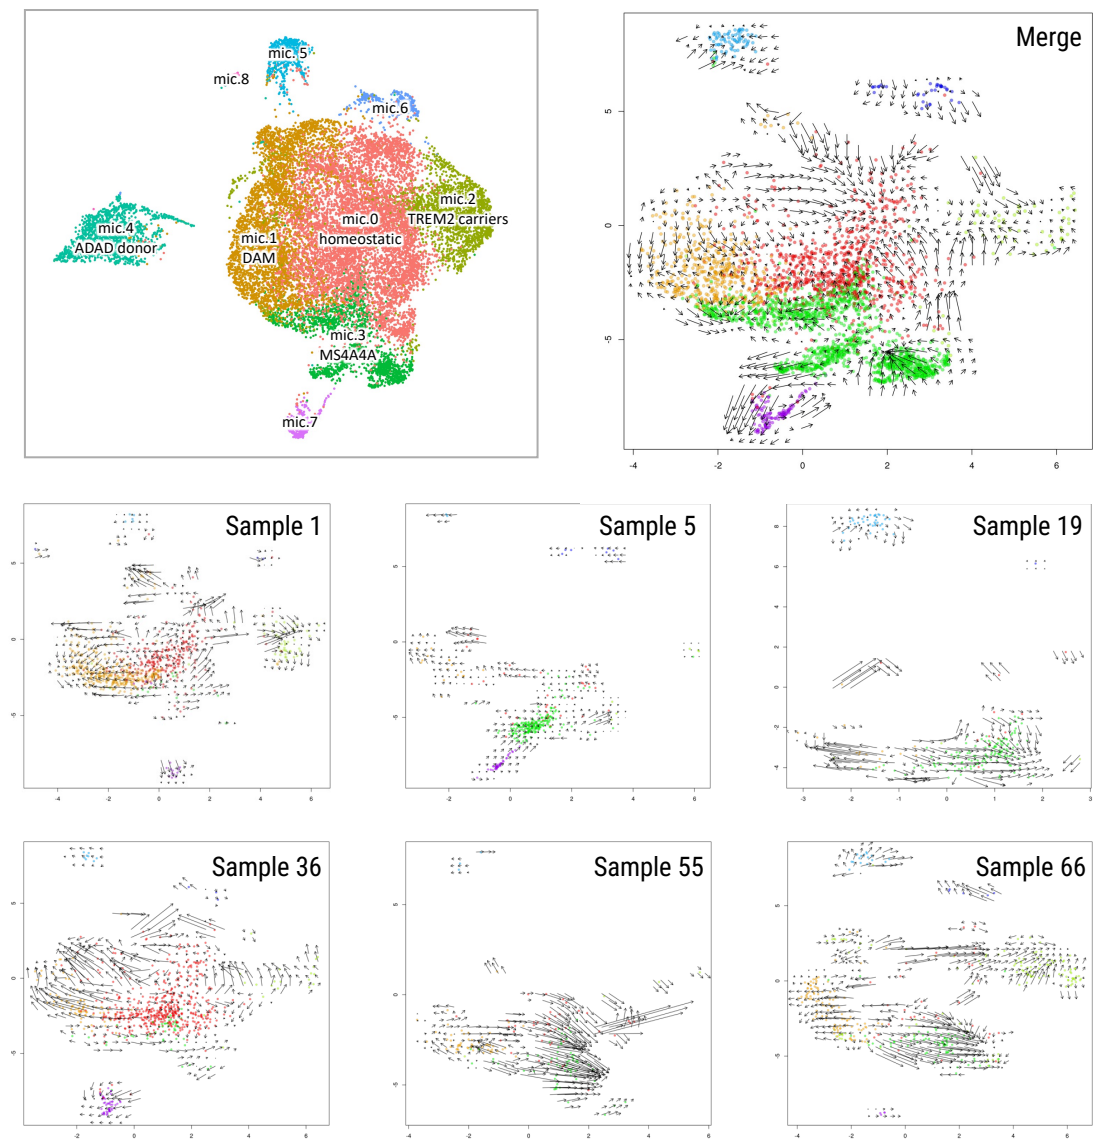

**Supplemental Figure 3. Examples of RNA velocity in some individual samples that contains Mic3. Top row represents merged data. Individual donors represents below.**

# Supplemental Figure 4

rs1582763 (G>A)

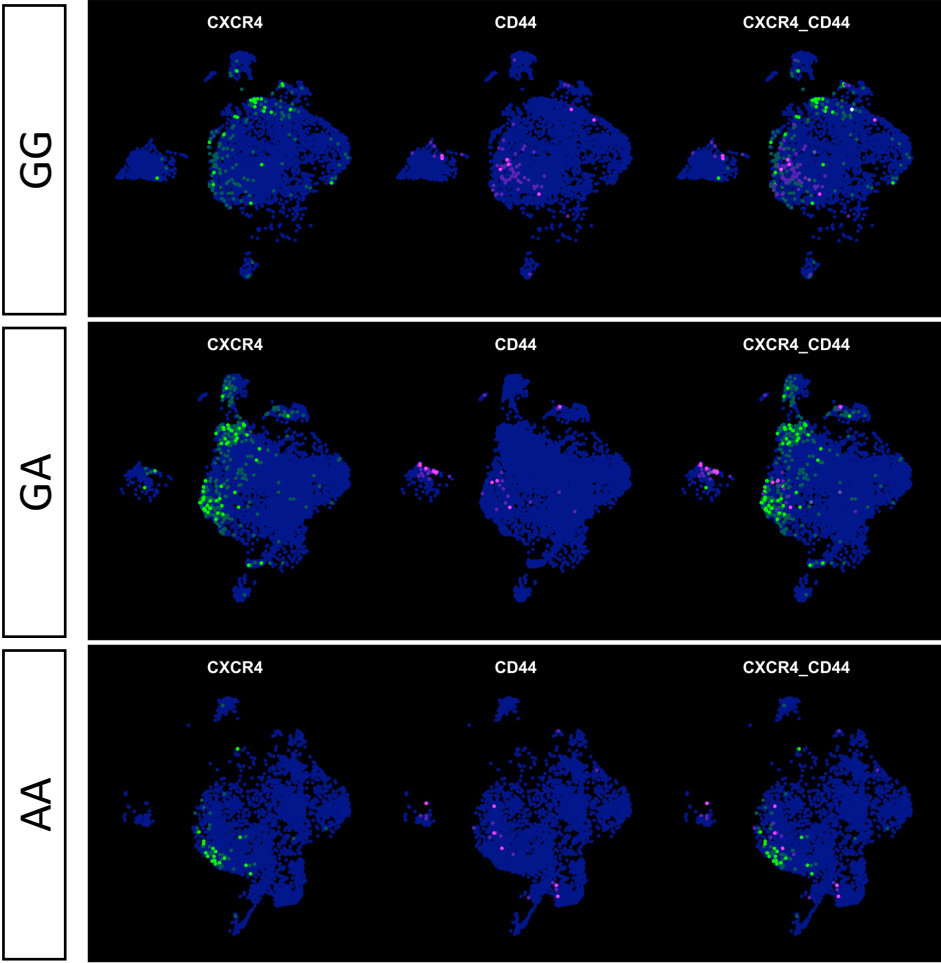

**Supplemental Figure 4. Low CXCR4 and CD44 co-expression in human brain snRNAseq data.** rs1582763-A minor allele carriers have less CD44+ nuclei and more CXCR4+ nuclei in microglia.

# Supplemental Figure 5

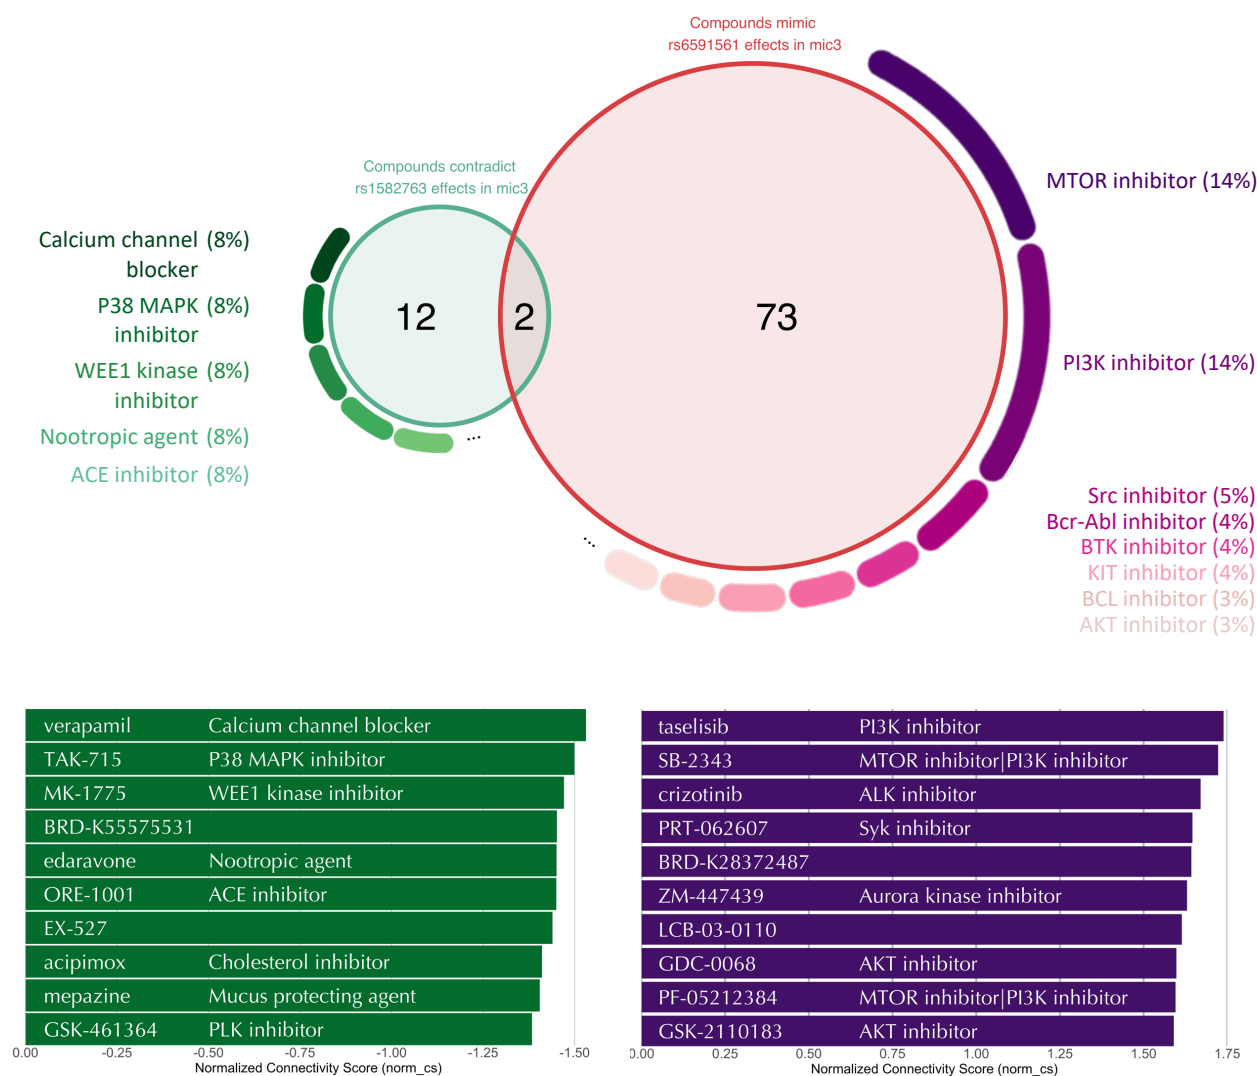

**Supplemental Figure 5. CMAP predicted compounds which contradict 1582763 and mimic rs6591561 in Mic3.** (Left) Compounds with effects that reverse gene expression changes associated with the protective variant rs1582763. (Right) Compounds with effects that mimic gene expression changes associated with the risk variant rs6591561.

## Supplemental Figure 6

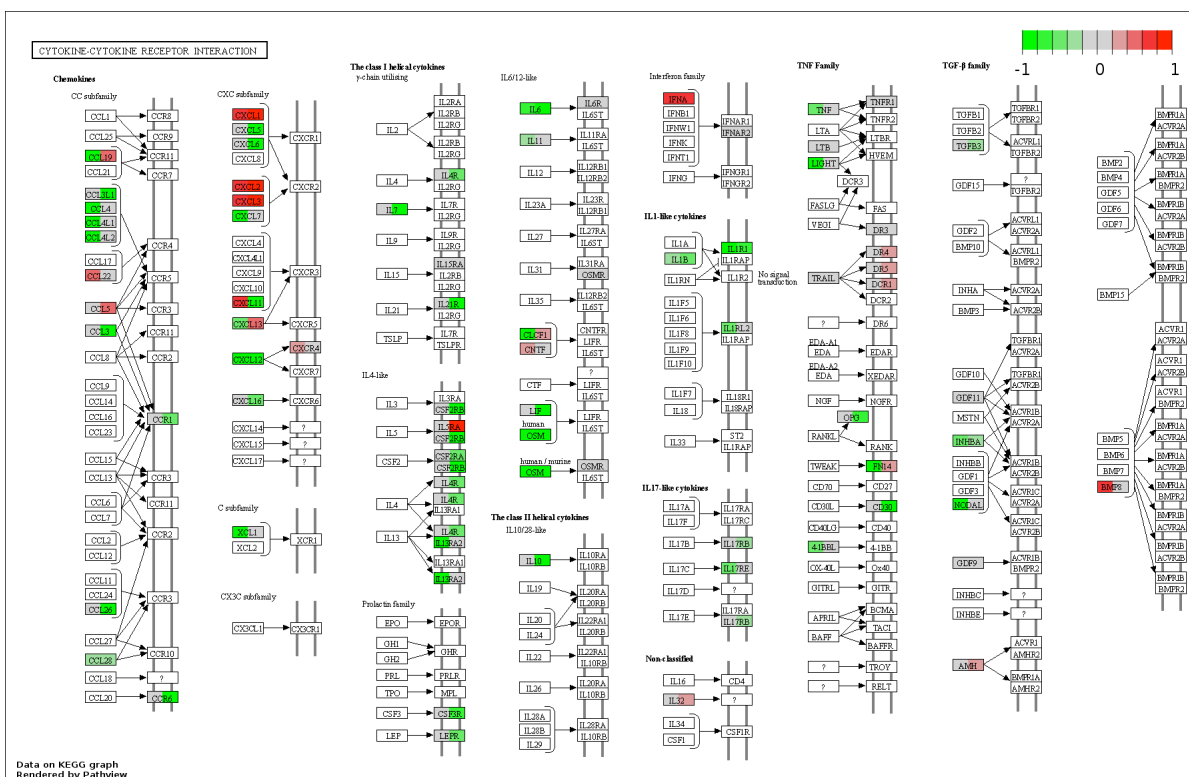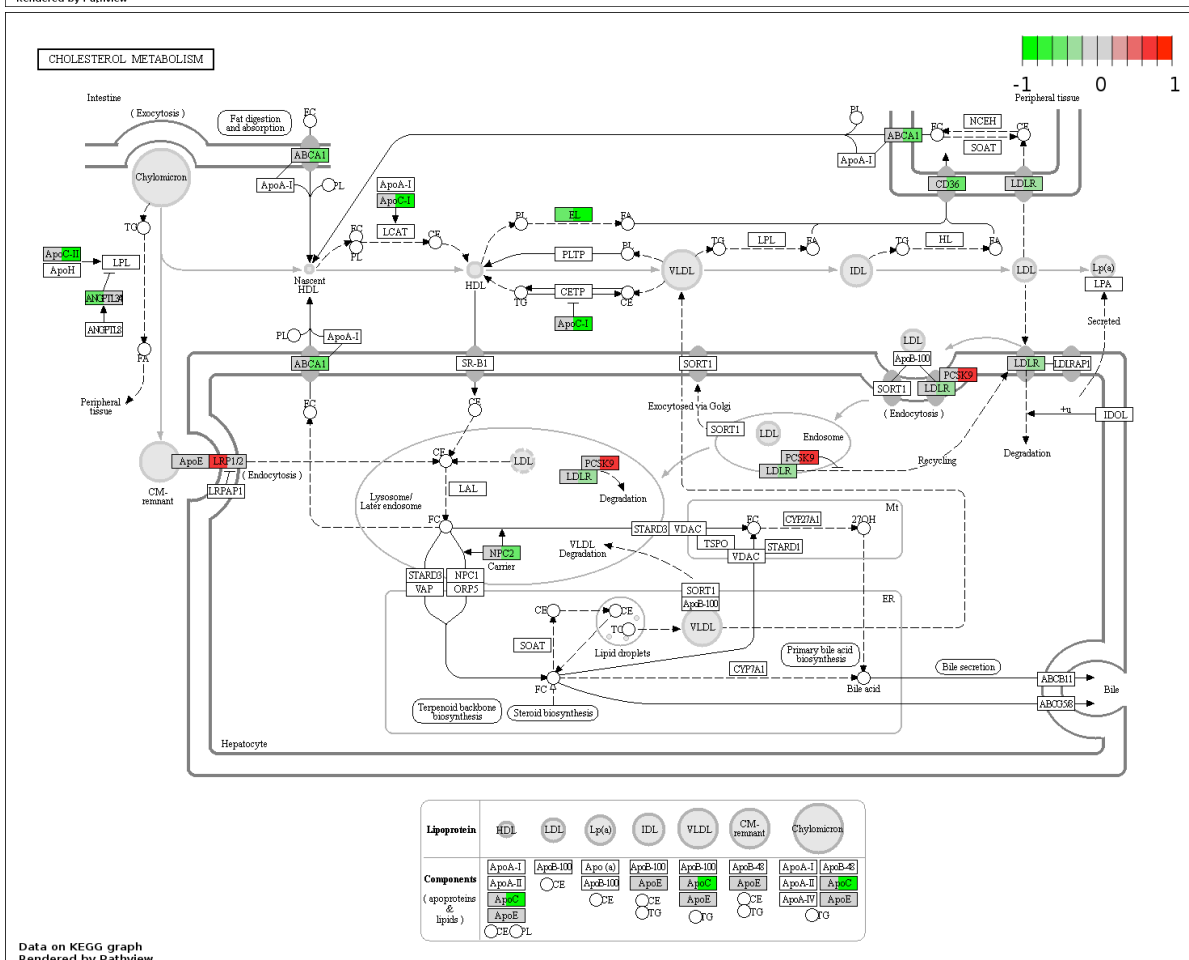

**Supplemental Figure 6. Pathways for “Cytokine-cytokine receptor interaction” and “Cholesterol metabolism” for differentially expressed genes in meta-analysis of bulk RNA-seq data in human brains.** For each given box, left is rs1582763, right is rs6591561. Red and green indicate up-regulated and down-regulated DEG in LogFC.

Supplemental Figure 7

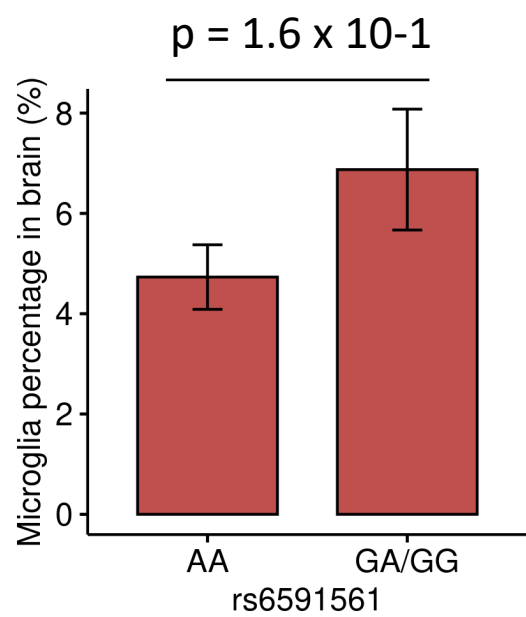

Supplemental Figure 7. Removing Mic.3 eliminated the effect of rs6591561 on overall microglia population.

# Supplemental Figure 8

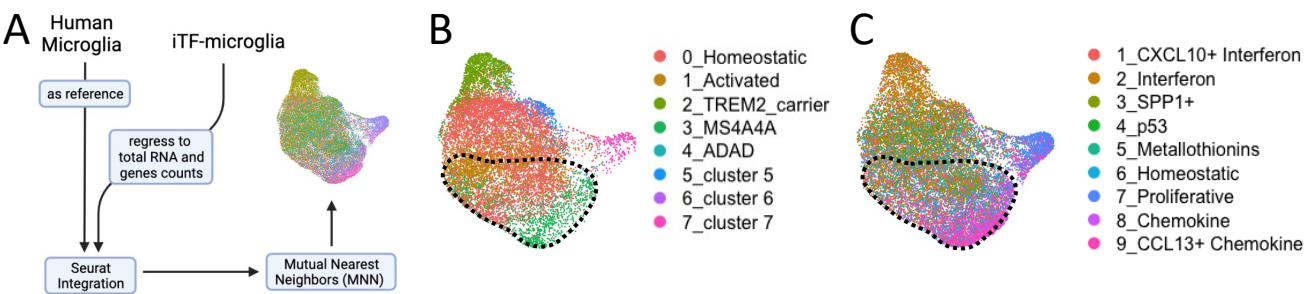

**Supplemental Figure 8. Integration of human microglia and iTF-microglia data.** A.

Schematic diagram of transcriptomic integration with human microglia and iTF-microglia using the Mutual Nearest Neighbors (MNN) method. (B) UMAP of Knight ADRC clusters. (C) iTF-microglia cluster clusters. Circle shows overlapping area between Mic.3 and iTF-microglia.8 (Chemokine) and iTF-microglia.9 (CCL13+ Chemokine).
